# Supplementary material
Source: MDPI journal article supplement (https://www.mdpi.com/2073-4344/13/2/416)
Supplement: s1 [file s1 › catalysts-2119604-supplementary.pdf]

## Article

# Altering the Regioselectivity of T1 lipase from *Geobacillus zalihae* toward sn-3 acylglycerol by a rational design approach

Samah Hashim Albayati<sup>1,2</sup>, Siti Nor Hasmah Ishak<sup>1,2,3</sup>, Adam Thean Chor Leow<sup>1,4,5</sup>, Mohd Shukuri Mohamad Ali<sup>1,3,4</sup>, Fairolniza Mohd Shariff<sup>1,2</sup>, Noor Dina Muhd Noor<sup>1,3</sup>, Raja Noor Zaliha Raja Abd Rahman<sup>1,2,4,\*</sup>

<sup>1</sup> Enzyme and Microbial Technology Research Centre, Faculty of Biotechnology and Biomolecular Sciences, Universiti Putra Malaysia, Serdang 43400, Selangor, Malaysia; [sama.hashim2019@gmail.com](mailto:sama.hashim2019@gmail.com); [masomian2000@yahoo.com](mailto:masomian2000@yahoo.com); [snhasmah@upm.edu.my](mailto:snhasmah@upm.edu.my); [mshukuri@upm.edu.my](mailto:mshukuri@upm.edu.my); [fairolniza@upm.edu.my](mailto:fairolniza@upm.edu.my); [dina@upm.edu.my](mailto:dina@upm.edu.my); [adamleow@upm.edu.my](mailto:adamleow@upm.edu.my).

<sup>2</sup> Department of Microbiology, Faculty of Biotechnology and Biomolecular Sciences, Universiti Putra Malaysia, Serdang 43400, Selangor, Malaysia

<sup>3</sup> Department of Biochemistry, Faculty of Biotechnology and Biomolecular Sciences, Universiti Putra Malaysia, Serdang 43400, Selangor, Malaysia

<sup>4</sup> Institute Bioscience, Universiti Putra Malaysia, Serdang 43400, Selangor, Malaysia

<sup>5</sup> Department of Cell and Molecular Biology, Faculty of Biotechnology and Biomolecular Sciences, Universiti Putra Malaysia, Serdang 43400, Selangor, Malaysia

\* Correspondence: [rnzaliha@upm.edu.my](mailto:rnzaliha@upm.edu.my)

**Abstract:** The regioselectivity characteristic of lipases facilitate a wide range of novel molecules unit construction and fat modifications. Lipases can be categorized as sn-1,3, sn-2, and random regio-specificity. *Geobacillus zalihae* T1 lipase catalyzes the hydrolysis of the sn-1,3 acylglycerol chain. The T1 lipase structural analysis shows that oxyanion hole F16 and its lid domain undergoes structural rearrangement upon activation. To study the structure of these parts and function, site-directed mutagenesis performed by substitution of the lid domain residues F180G/F181S and the oxyanion hole residue F16W. The novel lipase (3M) has switched the regioselectivity from sn-1,3 to only sn-3. The (3M) shifted the optimum pH to 10, altered selectivity toward p- nitrophenyl ester selectivity to C14-C18, and maintained similar catalytic efficiency of  $518.4 \times 10^{-6}$  (s<sup>-1</sup> /mM). The secondary structure of 3M lipase has contained 15.8% and 26.3% of  $\alpha$ -helix and  $\beta$ -sheet, respectively, with a predicted Tm value of 67.8 °C. In silico analysis was conducted to reveal the role of F180G/F181S/F16W mutations at the atomic level in blocking the binding of the sn-1 acylglycerol chain and orientating the substrate to bond to the sn-3 acylglycerol which resulted in switching the T1 lipase regioselectivity.

**Keywords:** T1 lipase; sn-3 regioselectivity; kinetic study; MD simulation; Molecular docking.

**Citation:** To be added by editorial staff during production.

Academic Editor: Firstname Last-name

Received: date

Accepted: date

Published: date

**Publisher's Note:** MDPI stays neutral with regard to jurisdictional claims in published maps and institutional affiliations.

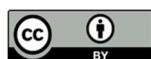

**Copyright:** © 2022 by the authors. Submitted for possible open access publication under the terms and conditions of the Creative Commons Attribution (CC BY) license (<https://creativecommons.org/licenses/by/4.0/>).

## Supplementary figures and tables

**Table S1: Characteristic of lipase variants.**

|                       | Optimum<br>Temperature<br>(°C) | pH<br>optimum | Melting<br>Temperature<br>(T <sub>m</sub> , °C) |
|-----------------------|--------------------------------|---------------|-------------------------------------------------|
| wt-T1                 | 70                             | 9             | 73.5±0.05                                       |
| F180G/F181S           | 70                             | 9             | 66.19±0.06                                      |
| F180G/F181S/F16D      | 70                             | 9             | 67.29 ±0.16                                     |
| F180G/F181S/F16Y      | 70                             | 9             | 73.3±0.3                                        |
| F180G/F181S/F16L      | 70                             | 9             | 65.85±0.1                                       |
| F180G/F181S/F16N      | 70                             | 9             | 65.81±0.1                                       |
| F180G/F181S/F16H      | 70                             | 10            | 66.47±0.3                                       |
| F180G/F181S/F16V      | 60                             | 9             | 70.45±0.2                                       |
| F180G/F181S/F16W (3M) | 70                             | 10            | 67.85±0.06                                      |
| F180G/F181S/F16I      | 70                             | 10            | 65.38±0.2                                       |
| F180G/F181S/F16S      | 70                             | 10            | 68.09±0.1                                       |
| F180G/F181S/F16C      | 70                             | 10            | 68.82±0.2                                       |
| F180G/F181S/F16G      | 70                             | 9             | 65.12±0.2                                       |

41

42

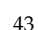

44  
45  
46

47

48

49

| Lipase       | Purification step | Volume mL | Total protein (mg) | Total activity (U) | Specific Activity (U/mg) | Yield (%) | Purification fold |
|--------------|-------------------|-----------|--------------------|--------------------|--------------------------|-----------|-------------------|
| <b>wt-T1</b> | Crude             | 20        | 92.2               | 9690               | 105.1                    | 100       | 1                 |
|              | Affinity          | 10        | 17.4               | 5311               | 305.2                    | 54.8      | 3                 |
| <b>3M</b>    | Crude             | 20        | 58                 | 2220               | 38.3                     | 100       | 1                 |
|              | Affinity          | 10        | 17                 | 1968               | 115.8                    | 88.6      | 3                 |

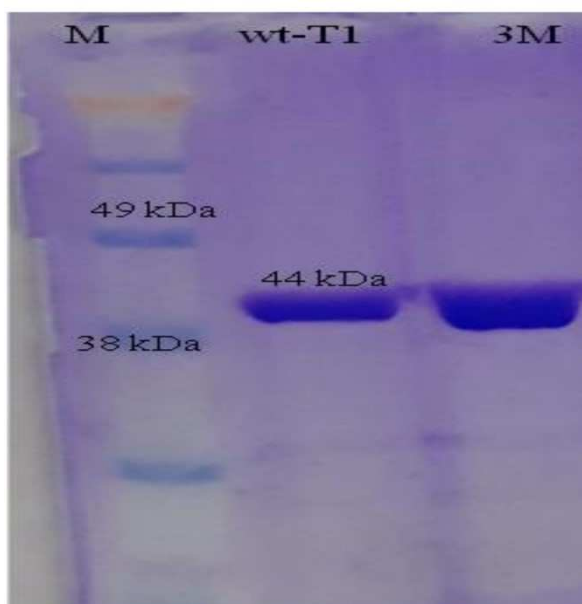

**Figure S2:** Sodium dodecyl-sulfate polyacrylamide gel electrophoresis (SDS-PAGE) analysis of purified wt-T1 and 3M variant lipases.

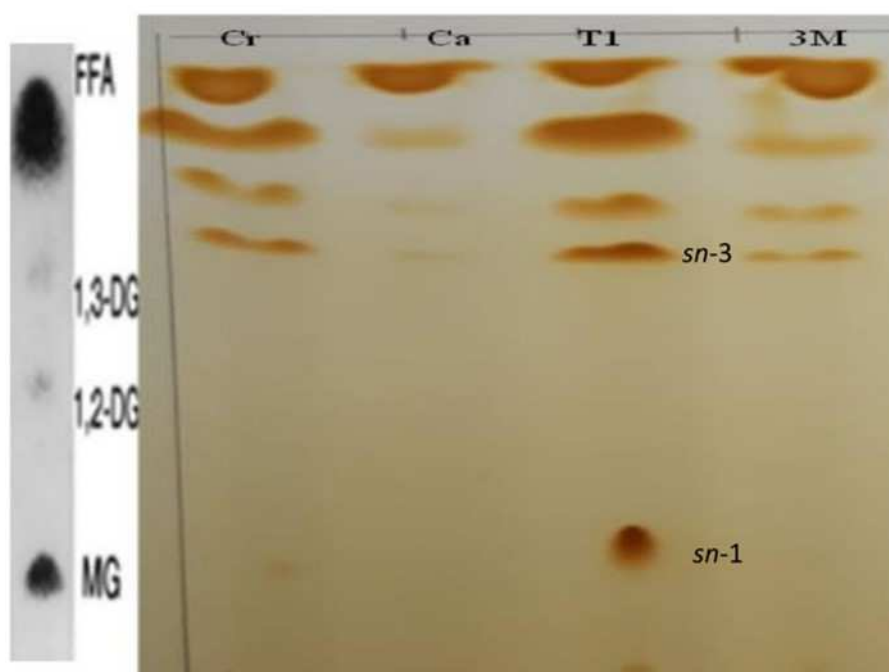

**Figure S3:** Thin-layer chromatography (TLC) sheet of purified wt-T1 and 3M variant lipases: Cr= *Candida rugosa* lipase, Ca= *Candida antarctica* lipase, T1= wt-T1 lipase, 3M= 3M variant lipase, respectively.

**Table S3.** Biochemical characterization of wt-T1 and its variant 3M

| Lipase | T <sub>Opt</sub> <sup>1</sup> (°C) | pH <sub>Opt</sub> | T <sub>m</sub> <sup>2</sup> | Energy changes <sup>3</sup><br>(kcal/mol) | Dissociation constant<br>(pM) |
|--------|------------------------------------|-------------------|-----------------------------|-------------------------------------------|-------------------------------|
| wt-T1  | 70                                 | 9                 | 73.5                        | -7.2360                                   | 47742780.0                    |
| 3M     | 70                                 | 10                | 67.8                        | -5.6440                                   | 19516978.0                    |

<sup>1</sup>Optimum temperatures and optimum pH of wt-T1 and 3M variant were determined using pNP-C12 as substrate. <sup>2</sup>The melting temperature of wt-T1 and 3M lipases. <sup>3</sup>Energy changes were calculated using YASARA software. YASARA definition of binding energy is more positive energies indicate stronger binding, and negative energies mean no binding.

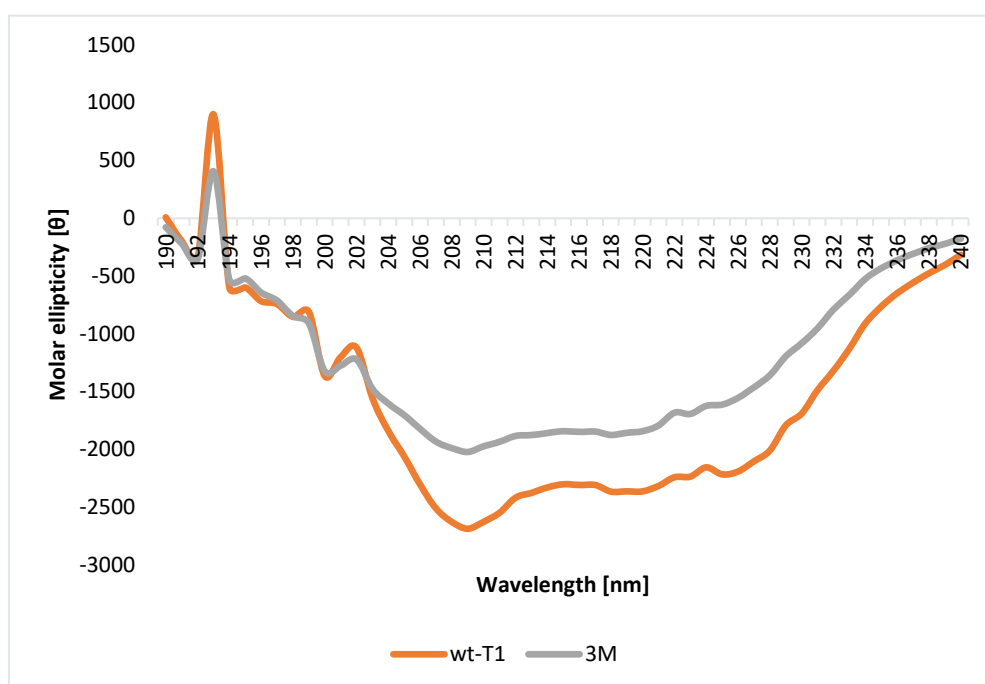

**Figure S4:** Circular dichroism (CD) spectra analysis of wt-T1 and 3M lipases at 190 to 240 nm. All scans were performed at temperature of 20 °C. Analysis of CD

spectral reference based on Yang [58], showing  $\alpha$ -helix (190–220), beta sheet (194–204), turn (199–240) and random coil (190–193).

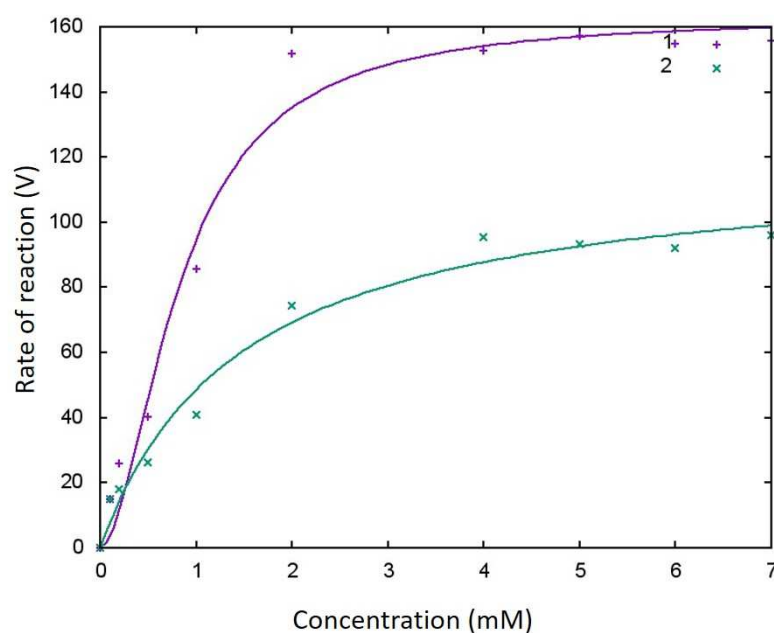

**Figure S5.** The change in the initial rate of the reaction at different concentrations of *p*NP-12 for wt-T1 (purple line) and 3M (green line) are shown. The figure is generated from online tool <http://www.ic50.tk/kmvmx.html>.

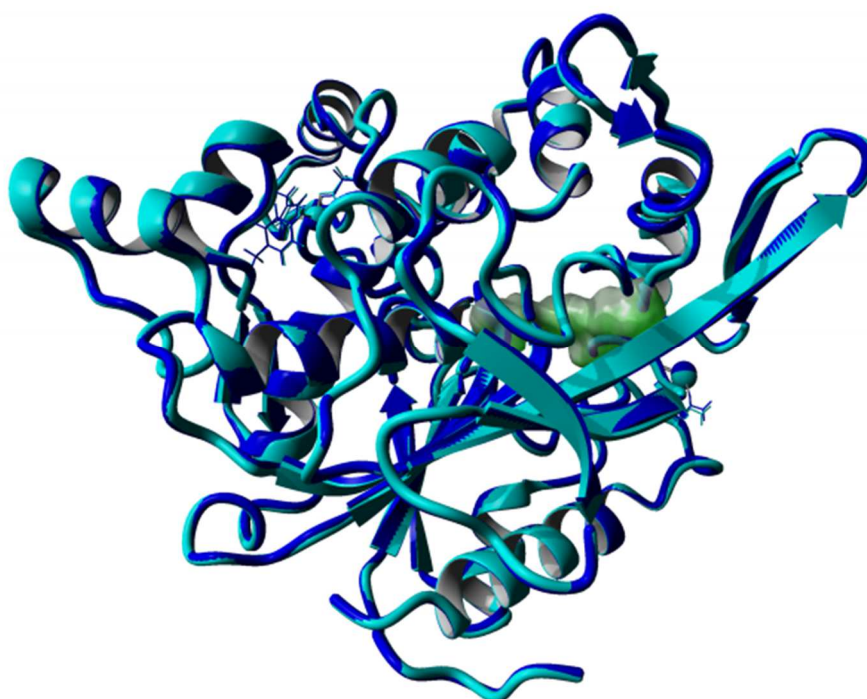

**Figure S6:** Superimposition of open conformation wt-T1 (blue) and 3M variant (cyan) structures. The green surface residues represent the catalytic triad.

87

88

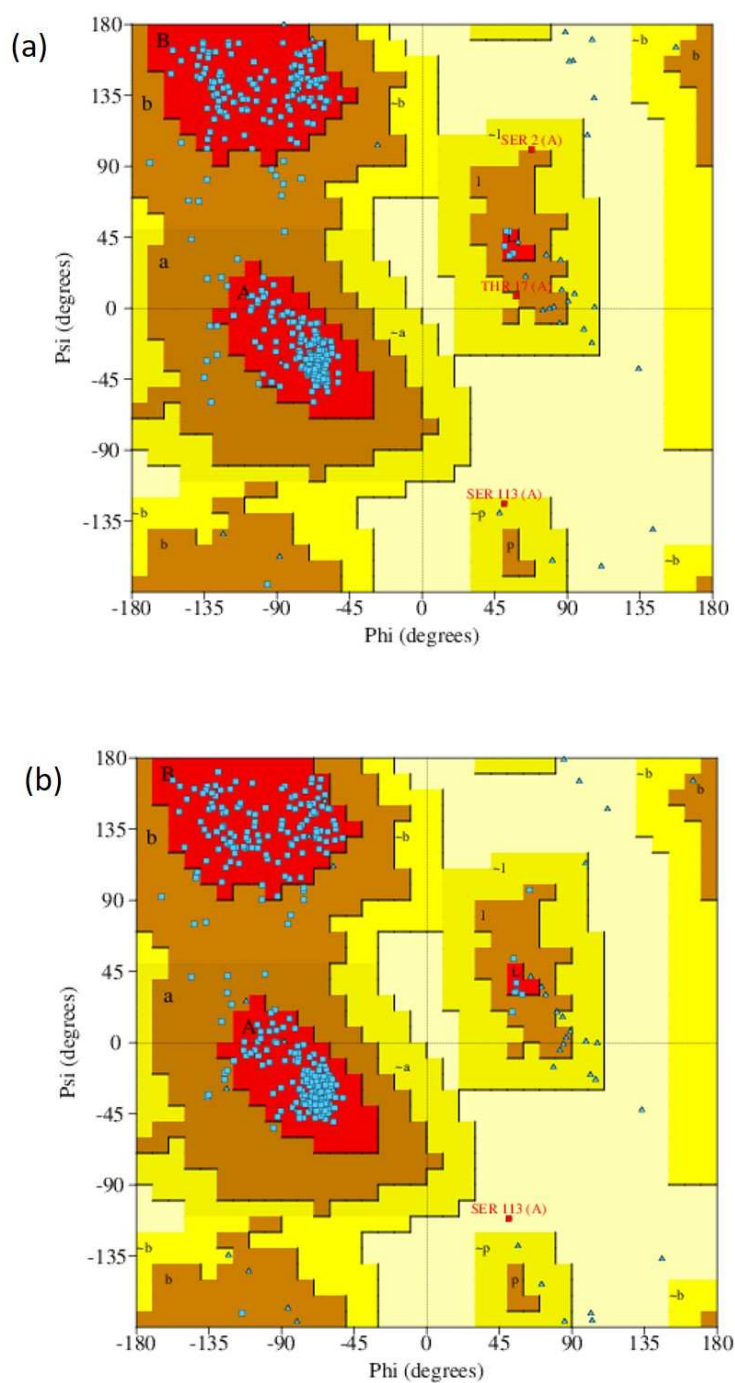

**Figure S7.** Ramachandran plot of wt-T1 (a) and 3M (b) lipases. The images generated using PDBsum (<http://www.ebi.ac.uk/thornton-srv/databases/pdbsum/Generate.html>)

89

90

91

92

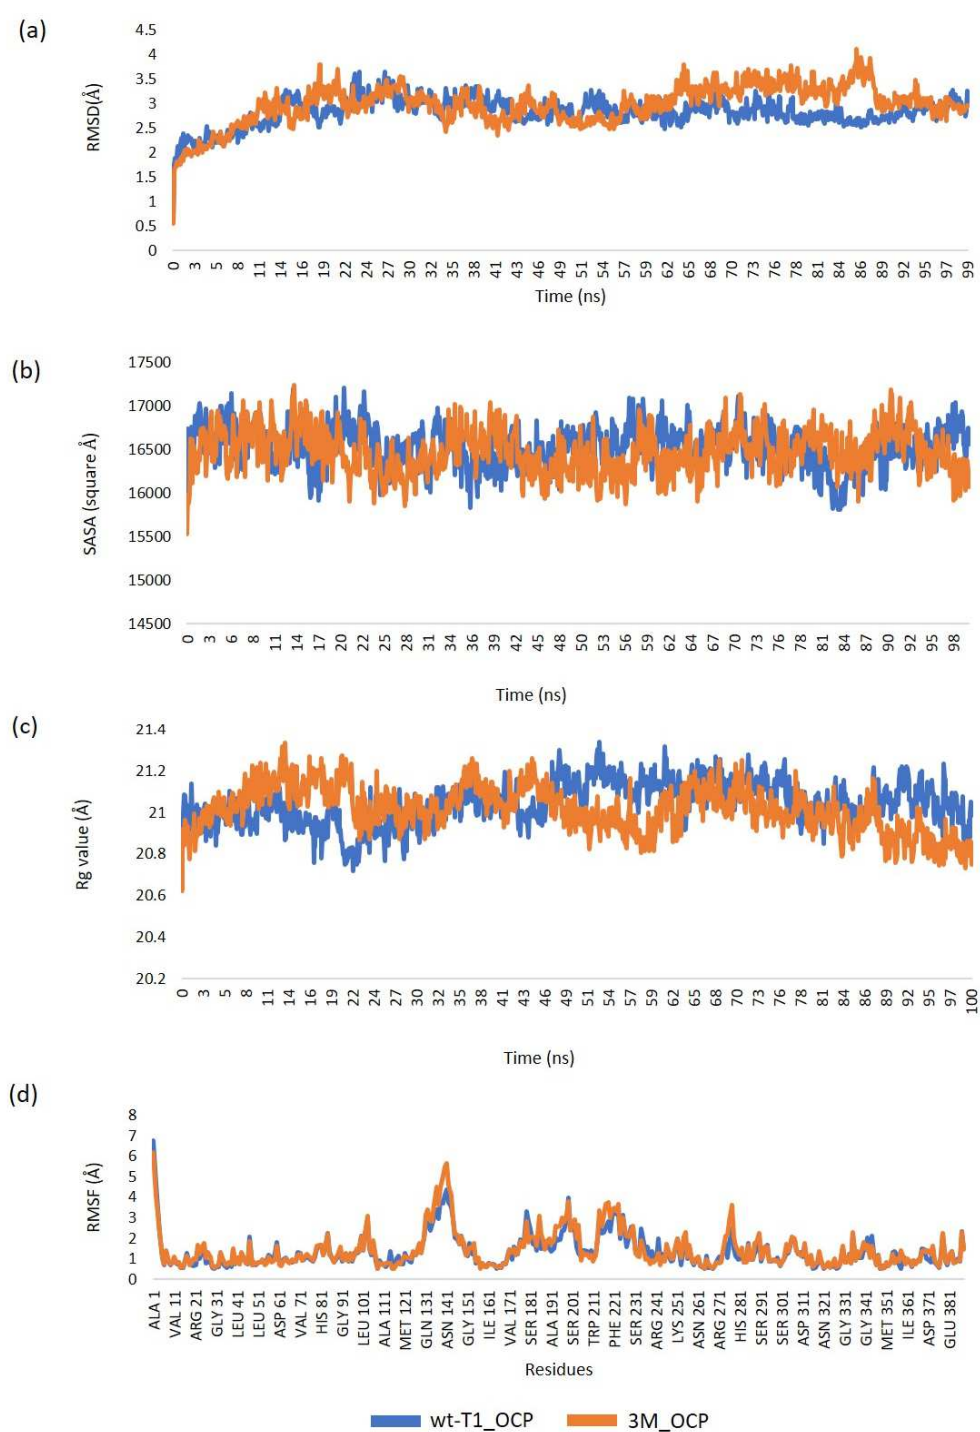

**Figure S8.** Molecular dynamics simulation analyses of lipases-complexed with the substrate (OCP). (a) Root Mean Square Deviation (RMSD). (b) Accessible surface area (SASA). (c) Radius of gyration. (d) Root means square fluctuation (RMSF).

**Table S4.** Residues with higher RMSF value peak and their corresponding location on wt-T1 lipase structure.

| Residue | Lipase | RMSF (Å) range | Structural part |
|---------|--------|----------------|-----------------|
|---------|--------|----------------|-----------------|

|                         |       |         |                           |
|-------------------------|-------|---------|---------------------------|
| Ala1-Ala5 (Peak 1)      | wt-T1 | 1-6.7   | N-terminal                |
|                         | 3M    | 1-6.1   |                           |
| pro95- Arg106 (peak 2)  | wt-T1 | 1.1-1.8 | Coil                      |
|                         | 3M    | 1.2-1.9 |                           |
| Ser130-Asn141 (Peak 3)  | wt-T1 | 1.9-4.3 | $\alpha$ 5-helix          |
|                         | 3M    | 2-5.6   |                           |
| Val171-Lys 185 (Peak 4) | wt-T1 | 1.4-2.5 | $\alpha$ 6-helix          |
|                         | 3M    | 1.4-3   |                           |
| Val193-Tyr 199 (Peak 5) | wt-T1 | 2-3.9   | coil                      |
|                         | 3M    | 2.6-3.8 |                           |
| Arg214-His223 (Peak 6)  | wt-T1 | 2.7-3.2 | Coil and $\alpha$ 7-helix |
|                         | 3M    | 3.3-3.7 |                           |
| Tyr273-Leu277 (Peak 7)  | wt-T1 | 1.3-2.4 | turn                      |
|                         | 3M    | 1.3-3.6 |                           |

100

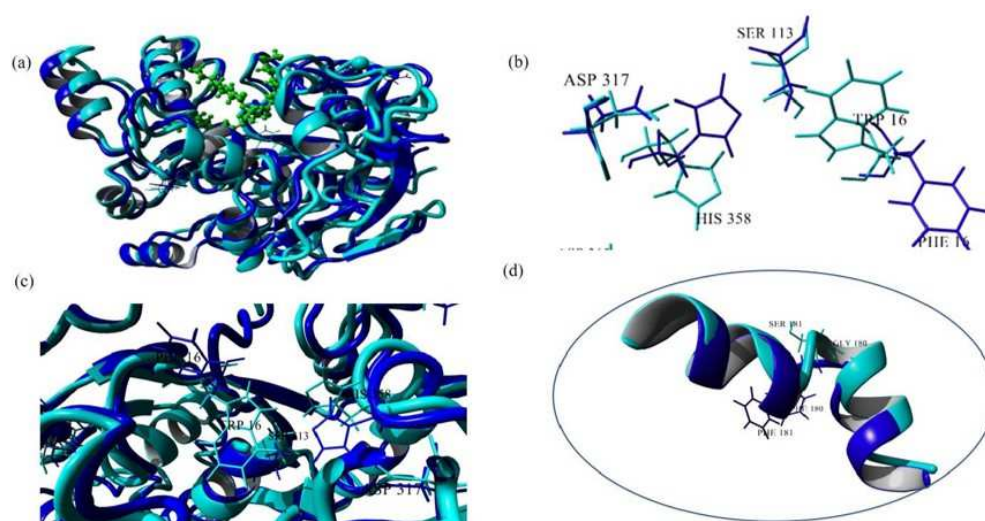

101

**Figure S9.** Superimposition of wt-T1 and 3M variant structure complexed with the substrate (OCP). (a) Global structure of wt-T1 and *sn*-3-regiospecific variant structure (b) Close up of the catalytic site residues (Asp317, His358, and Ser113). (c) The ribbon of binding site residues (d) Close up of the lid structure of lipases. The wt-T1 coloured in blue and 3M coloured in cyan.

102

103

104

105

106
